# Supplementary material for: European mushroom assemblages are darker in cold climates
Source: PubMed Central journal article supplement (PMC6599080; doi:10.1038/s41467-019-10767-z), 2019-06-28
Supplement: 41467_2019_10767_MOESM3_ESM.pdf [file 41467_2019_10767_MOESM3_ESM.pdf]

## **Description of Additional Supplementary Files**

File Name: Supplementary Data 1

Description: Species color data

File Name: Supplementary Data 2

Description: Phylogenetic tree

File Name: Supplementary Data 3

Description: Alternative phylogenetic hypotheses

File Name: Supplementary Data 4

Description: European species data set

File Name: Supplementary Data 5

Description: Color reliability test data

File Name: Supplementary Data 6

Description: Local species data set

File Name: Supplementary Data 7

Description: European species data set splitted for time shift analysis

File Name: Supplementary Data 8

Description: Experimental heating data set
